# Supplementary material for: Functions of Ceramide Synthase Paralogs YPR114w and YJR116w of Saccharomyces cerevisiae
Source: PubMed Central journal article supplement (PMC4713442; doi:10.1371/journal.pone.0145831), 2016-01-11
Supplement: pone.0145831.s001.pdf [file pone.0145831.s001.pdf]

# S1 File. Supporting information for Functions of ceramide synthase paralogs YPR114w and YJR116w of *Saccharomyces cerevisiae*

## Supplemental Materials and Methods

### Construction of strains

Deletion strains were constructed by using PCR derived deletion cassettes. For FBY7440, *SLC1-1* behind the *MET17* promoter was amplified from plasmid pBF212 using primers 5'-

ATCGATTGCTCCAAAAAGGGACATAGCACACCGACAGACCcggatgcaagggttcgaat  
c -3' (Forward) and 5'-

AAAAAGCTAAATAAAAGCGTTCCTTATCAGATATTACTCaggagggcgtgaatgtaagc  
g -3' (Reverse) having homology to *TRP5* up- and downstream regions (in caps) and the amplified product was transformed into the 4Δ. pBM150:LAG1 (FBY1184) strain to get 4Δ.LAG1 *trp5::SLC1-1* (FBY7436). Then the strain was grown on medium with 5'-fluoroanthranilic acid (FAA)[1] except that the medium contained 4% glucose and 1% galactose instead of 5% glucose. The obtained colonies were grown in Lester medium (LM) supplemented with Aureobasidin A to get rid of pBM150:LAG1 and obtain FBY7440. (5'-fluoro-orotic acid does not select against *URA3* plasmids on LM).

FBY7471 was constructed as follows: The *spHIS5* cassette was amplified from plasmid pUG27 using primers 5'-

AAAAAAAAACAATATTTTTAAGCTATCGCTCTTGCCGCAcagctgaagcttcgtacgc -3'  
(Forward) and 5'-

GTAAGGCGTTTCGTTGTTGAAGATAGAAAAAAGGTAGGTgcataggccactagtggat  
ctg -3' (Reverse) having homology to *YJR116w* up- and down-stream regions (in caps) and the PCR product was transformed into FBY7436 to obtain strain FBY7437.

FBY7437 was then transformed with a hygromycin cassette amplified from plasmid

pFA6a-hphNT1 using primers 5'-

GGAATTCAAGCACGAAGGTGAACATTGCCTACAAGAAAAAcgtacgctgcaggtcga

-3' (Forward) and 5'-

TATACACATATATGCACATGTTAAAGTGTGCCTCCATGGAatcgatgaattcgagctcg -

3' (Reverse) having homology to *YPR114w* up- and downstream regions (in caps) to

obtain strain FBY7468. The pBM150:LAG1 plasmid was shuffled out of the strain

FBY7468 to get FBY7471. To generate the homozygous diploid WT, *yjr116w*Δ,

*ypr114w*Δ and *yy*ΔΔ strains FBY7483, FBY7484, FBY7485 and FBY7486, haploid

*MATa* and *MATα* strains of the same genotype in BY4741 and BY4742 backgrounds,

respectively, were crossed with each other and selected on medium without Met, Lys and

Leu and supplemented with G418, except for diploid WT.

To make petite strains, the cells were grown to exponential phase ( $OD_{600} = 0.8$ ) in YPD,

$2 \mu\text{g ml}^{-1}$  ethidium bromide was added and cells were further incubated at 30 °C. After 6

h, cells were washed twice with sterile distilled water and plated on YPD and incubated

at 30°C. After a few days, colonies were plated on YPD and YP glycerol plates to

confirm them as  $\rho^-$  strains.

## Inositol labeling

Metabolic labeling with [ $^3\text{H}$ ]myo-inositol was carried out as described [2]. Briefly, WT,

4Δ and 6Δ strains were grown in inositol-free LM medium at 24°C. Exponentially

growing cells were collected and labeled in inositol-free LM medium with [ $^3\text{H}$ ]myo-

inositol at 24 °C for 2 h. Lipids were extracted, deacylated, desalted by Folch partitioning

and analyzed by TLC in solvent 1 (chloroform:methanol:0.25% KCl, 55:45:10). For

deacylation, samples were resuspended in 200  $\mu\text{l}$  of solvent 2

(chloroform:methanol:water, 10:10:3) and 40  $\mu\text{l}$  of 0.6 M NaOH was added, nothing to

controls. The control samples were incubated on ice and samples to be deacylated at

37°C for 1 h. Thereafter 40  $\mu\text{l}$  of 0.8 N acetic acid was added to all tubes and 40  $\mu\text{l}$  of 0.6

M NaOH was added only to the control tubes.

For GPI anchor remodeling cells were labeled with [ $^3\text{H}$ ]myo-inositol as above, but for 4 h

at 30 °C. GPI anchor lipids were isolated and analyzed as described [3] and separated on

TLC in solvent 1. TLC plates were then exposed and visualized using a phosphorimager (Bio-Rad Laboratories, Hercules, CA).

### **Vacuolar acidification**

To assess vacuolar acidification, 3 OD<sub>600</sub> units of exponentially growing cells were taken and resuspended in staining buffer (100 mM HEPES pH 7.6, and 0.2% glucose, 200 μM quinacrine) incubated at 30°C for 10 min, centrifuged, washed twice with wash buffer (0.2% glucose in 100 mM HEPES, pH 7.6) and resuspended in ice cold wash buffer. Cells were viewed under an Olympus BX54 microscope equipped with a piezo-positioner using the FITC filter within less than 60 min.

## Supplemental Tables

Table A. Sequences used for the cladogram in Fig 1D

| Query<br>( <i>S.cerevisiae</i> ) | Sequence<br>obtained<br>(Accession<br>number) | Organism<br>(Fungi) | Score first<br>query/ score<br>second query | Identity<br>(%) |
|----------------------------------|-----------------------------------------------|---------------------|---------------------------------------------|-----------------|
| <i>LAG1/LAC1</i>                 | EDP49621.1                                    | <i>A.fumigatus</i>  | 588/586                                     | 47/45           |
| <i>LAG1/LAC1</i>                 | XP_001394107.1                                | <i>A.niger</i>      | 571/563                                     | 49/46           |
| <i>LAG1/LAC1</i>                 | XP_956995.1                                   | <i>N.crassa</i>     | 604/597                                     | 43/44           |
| <i>LAG1/LAC1</i>                 | NP_982955.1                                   | <i>A.gossypii</i>   | 554/554                                     | 68/64           |
| <i>LAG1/LAC1</i>                 | XP_452132.1                                   | <i>K.lactis</i>     | 530/539                                     | 65/64           |
| <i>LAG1/LAC1</i>                 | XP_505079.1                                   | <i>Y.lipolytica</i> | 538/537                                     | 46/47           |
| <i>LAG1/LAC1</i>                 | XP_717940.1                                   | <i>C.albicans</i>   | 544/539                                     | 55/54           |
| <i>LAG1/LAC1</i>                 | NP_596102.1                                   | <i>S.pombe</i>      | 444/445                                     | 41/40           |
| <i>LAG1/LAC1</i>                 | KDQ12730.1                                    | <i>B.botryosum</i>  | 381/377                                     | 32/34           |
| <i>LAG1/LAC1</i>                 | XP_007337961.1                                | <i>A.delicata</i>   | 379/367                                     | 31/34           |
| YPR114w/YJR116w                  | KDQ21753.1                                    | <i>B.botryosum</i>  | 206/225                                     | 22/26           |
| YPR114w/YJR116w                  | XP_007347861.1                                | <i>A.delicata</i>   | 192/187                                     | 28/28           |
| YPR114w/YJR116w                  | XP_453728.1                                   | <i>K.lactis</i>     | 304/197                                     | 47/23           |
| YPR114w/YJR116w                  | NP_982626.1                                   | <i>A.gossypii</i>   | 271/197                                     | 38/25           |
| YPR114w/YJR116w                  | EHA19120.1                                    | <i>A.niger</i>      | 296/298                                     | 25/26           |
| YPR114w/YJR116w                  | KMK57131.1                                    | <i>A.fumigatus</i>  | 295/303                                     | 21/28           |
| YPR114w/YJR116w                  | XP_965364.2                                   | <i>N.crassa</i>     | 289/315                                     | 20/25           |
| YPR114w/YJR116w                  | NP_594236.1                                   | <i>S.pombe</i>      | 233/245                                     | 25/27           |
| YPR114w/YJR116w                  | AEY95224.1                                    | <i>A.gossypii</i>   | 187/250                                     | 24/43           |
| YPR114w/YJR116w                  | XP_453546.1                                   | <i>K.lactis</i>     | 201/266                                     | 27/49           |
| YPR114w/YJR116w                  | KGR03554.1                                    | <i>C.albicans</i>   | 229/265                                     | 27/34           |
| YPR114w/YJR116w                  | XP_500400.1                                   | <i>Y.lipolytica</i> | 216/232                                     | 22/34           |

Homologues of *LAG1*, *LAC1*, YJR116w and YPR114w in fungal model organisms were identified by PSI-Blast (<http://blast.ncbi.nlm.nih.gov/>) in fungal taxid (taxid:4751) with default parameters (PSI-BLAST threshold 0.005, and two reiterations) using the query genes indicated in the first column. It appears that when defining homologs as sequences identified with a significance threshold of  $P < 0.005$ , each of the hits found with *LAG1* was equally found with *LAC1*, but not by YPR114w or YJR116w, and *vice versa*, that each hit found with YPR114w was also found with YJR116w but not *LAG1* or *LAC1*. The homologs are identified by their accession numbers and have all been used to create the cladogram of Fig 1D.

**Table B. Yeast *Saccharomyces cerevisiae* strains.**

| Strain name                                  | Genotype                                                                                                                                                                                               | Reference                  |
|----------------------------------------------|--------------------------------------------------------------------------------------------------------------------------------------------------------------------------------------------------------|----------------------------|
| WT (BY4742)                                  | <i>MAT<math>\alpha</math> his3<math>\Delta</math>1 leu2<math>\Delta</math>0 lys2<math>\Delta</math>0 ura3<math>\Delta</math>0</i>                                                                      | EUROSCARF, (Frankfurt, GE) |
| <i>yjr116w<math>\Delta</math></i> (FBY7540)  | BY4742, but <i>yjr116w<math>\Delta</math>::kanMX4</i>                                                                                                                                                  | Roger Schneider            |
| <i>ypr114w<math>\Delta</math></i> (FBY7541)  | BY4742, but <i>ypr114w<math>\Delta</math>::kanMX4</i>                                                                                                                                                  | Roger Schneider            |
| <i>yy<math>\Delta\Delta</math></i> (FBY4352) | BY4742, but <i>yjr116w<math>\Delta</math>::kanMX4 ypr114w<math>\Delta</math>::LEU2</i>                                                                                                                 | Vikram Ghugtyal            |
| <i>isc1<math>\Delta</math></i> (FBY3335)     | BY4741, <i>MAT<math>\alpha</math> his3<math>\Delta</math>1 leu2<math>\Delta</math>0 met15<math>\Delta</math>0 ura3<math>\Delta</math>0 isc1<math>\Delta</math>::natMX</i>                              | This study                 |
| WT (W303-1A)                                 | <i>MAT<math>\alpha</math> ade2-1 can1-100 ura3-1 leu2-3,112 trp1-1 his3-11,15</i>                                                                                                                      | EUROSCARF                  |
| 4 $\Delta$ .LAG1 (FBY1184)                   | W303-1A, but <i>lac1<math>\Delta</math>::ADE2 lag1<math>\Delta</math>::TRP1 ydc1<math>\Delta</math>::natMX ypc1<math>\Delta</math>::kanMX4</i> containing pBM150:LAG1                                  | Vanessa Cerantola          |
| 4 $\Delta$ (FBY7440)                         | W303-1A, but <i>lac1<math>\Delta</math>::ADE2 lag1<math>\Delta</math>::TRP1 ydc1<math>\Delta</math>::natMX ypc1<math>\Delta</math>::kanMX4 trp5<math>\Delta</math>::SLC1-1</i>                         | This study                 |
| 6 $\Delta$ (FBY7471)                         | FBY7440, but <i>yjr116w<math>\Delta</math>::spHIS5 ypr114w<math>\Delta</math>::HYG</i>                                                                                                                 | This study                 |
| 4 $\Delta$ .LAG1 (FBY7436)                   | W303-1A, but <i>lac1<math>\Delta</math>::ADE2 lag1<math>\Delta</math>::TRP1, ydc1<math>\Delta</math>::natMX ypc1<math>\Delta</math>::kanMX4 trp5<math>\Delta</math>::SLC1-1</i> containing pBM150:LAG1 | This study                 |
| 5 $\Delta$ .LAG1 (FBY7437)                   | FBY7436, but <i>yjr116w<math>\Delta</math>::spHIS5</i>                                                                                                                                                 | This study                 |
| 6 $\Delta$ .LAG1 (FBY7468)                   | FBY7437, but <i>ypr114w<math>\Delta</math>::HYG</i>                                                                                                                                                    | This study                 |
| WT (BY4741)                                  | <i>MAT<math>\alpha</math> his3<math>\Delta</math>1, leu2<math>\Delta</math>0, met15<math>\Delta</math>0, ura3<math>\Delta</math>0</i>                                                                  | EUROSCARF                  |
| <i>yjr116w<math>\Delta</math></i> (FBY7538)  | BY4741, but <i>yjr116w<math>\Delta</math>::kanMX4</i>                                                                                                                                                  | EUROSCARF                  |
| <i>ypr114w<math>\Delta</math></i> (FBY7539)  | BY4741, but <i>ypr114w<math>\Delta</math>::kanMX4</i>                                                                                                                                                  | EUROSCARF                  |
| <i>yy<math>\Delta\Delta</math></i> (FBY7482) | BY4741, but <i>yjr116w<math>\Delta</math>::kanMX4 ypr114w<math>\Delta</math>::LEU2</i>                                                                                                                 | This study                 |
| WT (FBY7443)                                 | BY4741 <i>MAT<math>\alpha</math> his3<math>\Delta</math>1 leu2<math>\Delta</math>0 met15<math>\Delta</math>0 ura3<math>\Delta</math>0</i> , but containing pYES2/NT B                                  | This study                 |
| <i>yjr116w<math>\Delta</math></i> (FBY7446)  | FBY7443, but <i>yjr116w<math>\Delta</math>::kanMX4</i>                                                                                                                                                 | This study                 |
| <i>ypr114w<math>\Delta</math></i> (FBY7447)  | FBY7443, but <i>ypr114w<math>\Delta</math>::kanMX4</i>                                                                                                                                                 | This study                 |
| 116 $\Delta$ .116 (FBY7444)                  | As FBY7446, but containing pBF771                                                                                                                                                                      | This study                 |
| 114 $\Delta$ .114                            | As FBY7447, but containing pBF772                                                                                                                                                                      | This study                 |

|                                  |                                                                                                  |                  |
|----------------------------------|--------------------------------------------------------------------------------------------------|------------------|
| (FBY7445)                        |                                                                                                  |                  |
| <i>hac1Δ</i> (YJU 82)            | <i>MATα trp1-1 his3-Δ200 ura3-52 lys2-801 leu2-3,112 hac1Δ::TRP1</i>                             | [4]              |
| WT (W303-1B)                     | <i>MATα ade2-1 can1-100 ura3-1 leu2-3,112 trp1-1 his3-11,15</i>                                  | EUROSCARF        |
| <i>yjr116wΔ</i> (FBY7497)        | W303-1B, but <i>yjr116wΔ::spHIS5</i>                                                             | This study       |
| <i>ypr114wΔ</i> (FBY7498)        | W303-1B, but <i>ypr114wΔ::spHIS5</i>                                                             | This study       |
| WT.mtGFP (FBY7499)               | As BY4742, but containing pYES-mtGFP                                                             | This study       |
| <i>yjr116wΔ.mtGFP</i> (FBY7500)  | As <i>yjr116wΔa</i> (FBY7540), but containing pYES-mtGFP                                         | This study       |
| <i>ypr114wΔ.mtGFP</i> (FBY7501)  | As <i>ypr114wΔa</i> (FBY7541), but containing pYES-mtGFP                                         | This study       |
| <i>yyΔΔ.mtGFP</i> (FBY7502)      | As FBY4352, but containing pYES-mtGFP                                                            | This study       |
| <i>isc1Δ.mtGFP</i> (FBY7503)     | As FBY3335, but containing pYES-mtGFP                                                            | This study       |
| WT (FBY7527)                     | As BY4742, but containing pBF776                                                                 | This study       |
| <i>yjr116wΔ</i> (FBY7528)        | As <i>yjr116wΔ</i> (FBY7540), but containing pBF776                                              | This study       |
| <i>ypr114wΔ</i> (FBY7529)        | As YPR114w (FBY7541), but containing pBF776                                                      | This study       |
| <i>116Δ.116</i> (FBY7530)        | As <i>yjr116wΔ</i> (FBY7540), but containing pBF774                                              | This study       |
| <i>114Δ.114</i> (FBY7531)        | As <i>ypr114wΔ</i> (FBY7541), but containing pBF775                                              | This study       |
| <i>mmm1Δ ypr114wΔ</i> (FBY7496)  | BY4741, but <i>mmm1Δ::kanMX ypr114wΔ::spHIS5</i>                                                 | This study       |
| <i>mdm32Δ ypr114wΔ</i> (FBY7495) | BY4741, but <i>mdm32Δ::kanMX ypr114wΔ::spHIS5</i>                                                | This study       |
| WT (YPK9)                        | <i>MATa ade2-101<sup>ochre</sup> his3-Δ200 leu2-Δ1 lys2-801<sup>amber</sup> trp1-Δ63 ura3-52</i> | Michal Jazwinski |
| <i>yjr116wΔ</i> (FBY7491)        | YPK9, but <i>yjr116wΔ::spHIS5</i>                                                                | This study       |
| <i>ypr114wΔ</i> (FBY7492)        | YPK9, but <i>ypr114wΔ::spHIS5</i>                                                                | This study       |
| WT (FBY7483)                     | <i>MATa/α his3Δ1 / his3Δ1, leu2Δ0 / leu2Δ0, lys2Δ0 / LYS2, MET15 / met15Δ0, ura3Δ0 / ura3Δ0</i>  | This study       |
| <i>yjr116wΔ</i> (FBY7484)        | As FBY7483, but <i>yjr116wΔ::kanMX / yjr116wΔ::kanMX</i>                                         | This study       |
| <i>ypr114wΔ</i> (FBY7485)        | As FBY7483, but <i>ypr114wΔ::kanMX / ypr114wΔ::kanMX</i>                                         | This study       |

|                                  |                                                                                                                 |                |
|----------------------------------|-----------------------------------------------------------------------------------------------------------------|----------------|
| yyΔΔ (FBY7486)                   | As FBY7483, but <i>yjr116wΔ::kanMX</i> / <i>yjr116wΔ::kanMX</i> , <i>ypr114wΔ::LEU2</i> / <i>ypr114wΔ::LEU2</i> | This study     |
| WT.SEC7-GFP (FBY7506)            | As BY4742, but containing pSEC7-GFP                                                                             | This study     |
| yyΔΔ.SEC7-GFP (FBY7513)          | As FBY4352, but containing pSEC7-GFP                                                                            | This study     |
| WT.SED5-GFP (FBY7505)            | As BY4742, but containing pGFP-SED5                                                                             | This study     |
| yyΔΔ.SED5-GFP (FBY7512)          | As FBY4352, but containing pGFP-SED5                                                                            | This study     |
| WT.SNC1-GFP (FBY7507)            | As BY4742, but containing pGS416-SNC1                                                                           | This study     |
| yyΔΔ.SNC1-GFP (FBY7514)          | As FBY4352, but containing pGS416-SNC1                                                                          | This study     |
| WT.SSO1-GFP (FBY7508)            | As BY4742, but containing pSSO416                                                                               | This study     |
| yyΔΔ.SSO1-GFP (FBY7515)          | As FBY4352, but containing pSSO416                                                                              | This study     |
| <i>cpr3Δ yjr116wΔ</i> (FBY7532)  | <i>cpr3::kanMX yjr116wΔ::LEU2</i>                                                                               | This study     |
| <i>aif1Δ yjr116wΔ</i> (FBY7533)  | <i>aif1Δ::kanMX yjr116wΔ::spHIS5</i>                                                                            | This study     |
| <i>yca1Δ yjr116wΔ</i> (FBY7532)  | <i>yca1Δ::kanMX yjr116wΔ::spHIS5</i>                                                                            | This study     |
| <i>cox12Δ yjr116wΔ</i> (FBY7532) | <i>cox12Δ::kanMX yjr116wΔ::spHIS5</i>                                                                           | This study     |
| WT (FBY7536)                     | BY4742, but petite                                                                                              | This study     |
| <i>yjr116wΔ</i> (FBY7537)        | YJR116w (FBY7540), but petite                                                                                   | This study     |
| WT (RH3435)                      | S288c background, <i>MATa his4 leu2 ura3 lys2 bar1</i>                                                          | Howard Riezman |
| <i>yjr116wΔ</i> (FBY7487)        | RH3435, but <i>yjr116wΔ::URA3</i>                                                                               | This study     |
| <i>ypr114wΔ</i> (FBY7488)        | RH3435, but <i>ypr114wΔ::URA3</i>                                                                               | This study     |

Several strains are named *yjr116wΔ* or *ypr114wΔ*. In the manuscript, the corresponding control strain usually tells, which strain was used except for deletions with different mating types in the same genetic background, e.g. FBY7540 and FBY7538.

Single deletion strains not listed in this table were from the EUROSCARF collection.

Table C. Plasmids

|              |                                                                                                                                                                                                                                   |                |
|--------------|-----------------------------------------------------------------------------------------------------------------------------------------------------------------------------------------------------------------------------------|----------------|
| pBM150:LAG1  | <i>LAG1</i> in CEN ARS <i>URA3</i> , <i>GAL</i> promoter                                                                                                                                                                          | [5]            |
| pBF212       | <i>SLC1-1</i> in p413 CEN ARS <i>HIS3</i> , <i>MET25</i> promoter                                                                                                                                                                 | [6]            |
| pYES2/NT B   | 2 $\mu$ <i>URA3</i> , <i>GAL</i> promoter                                                                                                                                                                                         | Invitrogen     |
| pBF771       | <i>YJR116w</i> in pYES2/NT B                                                                                                                                                                                                      | This study     |
| pBF772       | <i>YPR114w</i> in pYES2/NT B 2 $\mu$                                                                                                                                                                                              | This study     |
| pYES-mtGFP   | mtGFP in pYES2/NT B 2 $\mu$                                                                                                                                                                                                       | [7]            |
| pBF776       | pCM172 (CEN <i>TRP1</i> , tet <sub>off</sub> promoter) from EUROSCARF, but having also <i>LEU2</i>                                                                                                                                | This study     |
| pBF775       | <i>YPR114w</i> in pBF776                                                                                                                                                                                                          | This study     |
| pSEC7-GFP    | <i>SEC7-GFP</i> in CEN <i>URA3</i> , <i>ADH1</i> promoter<br><a href="http://www2.brc.riken.jp/lab/dna/detail.cgi?rdbno=08662">http://www2.brc.riken.jp/lab/dna/detail.cgi?rdbno=08662</a>                                        | Akihiko Nakano |
| pGFP-SED5    | GFP- <i>SED5</i> in CEN <i>URA3</i> , <i>ADH1</i> promoter<br><a href="http://www2.brc.riken.jp/cache/dna/8658">http://www2.brc.riken.jp/cache/dna/8658</a>                                                                       | Akihiko Nakano |
| pGS416-SNC1  | GFP- <i>SNC1</i> in CEN <i>URA3</i> , <i>TPII</i> promoter                                                                                                                                                                        | [8] H. Pelham  |
| pSSO416      | GFP- <i>SSO1</i> in CEN <i>URA3</i> , <i>TPII</i> promoter                                                                                                                                                                        | F. Reggiori    |
| pPHM5416     | GFP- <i>PHM5</i> in CEN <i>URA3</i> , <i>TPII</i> promoter                                                                                                                                                                        | [9]            |
| pUG27        | loxP-P <sub>AgTEF1</sub> - <b>Sphis5</b> -T <sub>AgTEF1</sub> -loxP, <a href="http://web.uni-frankfurt.de/fb15/mikro/euroscarf/data/pUG27.html">http://web.uni-frankfurt.de/fb15/mikro/euroscarf/data/pUG27.html</a>              | EUROSCARF      |
| pFA6a-hphNT1 | hph gene from <i>Klebsiella pneumonia</i> (for hygromycin B resistance) <a href="http://web.uni-frankfurt.de/fb15/mikro/euroscarf/data/pFA6hphNT1.html">http://web.uni-frankfurt.de/fb15/mikro/euroscarf/data/pFA6hphNT1.html</a> | EUROSCARF      |



**Table D. Modulation of copper sensitivity by N-acetyl-L-cysteine (NAC)**

| Strain         | Resistance to copper | Improved by NAC       | Category |
|----------------|----------------------|-----------------------|----------|
| BY4741         | As WT                | Yes, as WT            | A        |
| <i>yps6</i> Δ  | ↓↓↓                  | No                    | B        |
| <i>hac1</i> Δ  | ↓↓↓                  | Yes, as WT            | A        |
| <i>vps8</i> Δ  | ↓↓↓                  | Yes, but less than WT | C        |
| <i>csg2</i> Δ  | ↑↑↑                  | NA <sup>2)</sup>      | D        |
| <i>ipt1</i> Δ  | ↑↑↑                  | NA                    | D        |
| <i>vps60</i> Δ | as WT                | Yes, as WT            | A        |
| <i>erg4</i> Δ  | as WT                | Yes, but less than WT | E        |
| <i>cup2</i> Δ  | ↓↓↓                  | No                    | B        |
| <i>psd2</i> Δ  | as WT                | Yes, as WT            | A        |
| <i>vps35</i> Δ | as WT                | Yes, but less than WT | E        |
| <i>cnb1</i> Δ  | ↓↓↓                  | No                    | B (C)    |
| <i>mid1</i> Δ  | ↓↓↓                  | No                    | B        |
| <i>csg1</i> Δ  | ↑↑↑                  | Yes, as WT            | D        |
| <i>taz1</i>    | ↓↓↓                  | No                    | B (C)    |
| <i>aqy1</i> Δ  | ↓↓↓                  | No                    | B        |

The growth behavior of each strain in Fig E, panel E was compared to the one of WT and this allowed classifying strains into phenotypes A - E defined as follows:

A: Sensitivity in presence and absence of NAC as in WT

B: Hypersensitive, NAC cannot rescue hypersensitivity

C: Hypersensitive, NAC rescues hypersensitivity only partially

D: Hyperresistant

E: Sensitivity in absence of NAC as in WT, but more sensitive than WT in presence of NAC

<sup>1)</sup> ↓↓↓ resistance decreased; ↑↑↑ resistance increased

<sup>2)</sup> NA: Not applicable since growth is vigorous on copper even without NAC

Unless listed in Table B, the strains are the EUROSCARF deletion strains in the BY4741 background, having indicated genes replaced by a kanMX4 cassette.

## References of Supporting Information

1. Toyn JH, Gunyuzlu PL, White WH, Thompson LA, Hollis GF (2000) A counterselection for the tryptophan pathway in yeast: 5-fluoroanthranilic acid resistance. *Yeast* 16: 553-560.
2. Vazquez HM, Vionnet C, Roubaty C, Conzelmann A (2014) Cdc1 removes the ethanolaminephosphate of the first mannose of GPI anchors and thereby facilitates the integration of GPI proteins into the yeast cell wall. *Mol Biol Cell*
3. Guillas I, Pfefferli M, Conzelmann A (2000) Analysis of ceramides present in glycosylphosphatidylinositol anchored proteins of *Saccharomyces cerevisiae*. *Methods Enzymol* 312: 506-515.
4. Friedlander R, Jarosch E, Urban J, Volkwein C, Sommer T (2000) A regulatory link between ER-associated protein degradation and the unfolded-protein response. *Nat Cell Biol* 2: 379-384.
5. Guillas I, Kirchman PA, Chuard R, Pfefferli M, Jiang JC, Jazwinski SM et al. (2001) C26-CoA-dependent ceramide synthesis of *Saccharomyces cerevisiae* is operated by Lag1p and Lac1p. *EMBO J* 20: 2655-2665.
6. Vionnet C, Roubaty C, Ejsing CS, Knudsen J, Conzelmann A (2011) Yeast cells lacking all known ceramide synthases continue to make complex sphingolipids and to incorporate ceramides into glycosylphosphatidylinositol (GPI) anchors. *J Biol Chem* 286: 6769-6779.
7. Westermann B, Neupert W (2000) Mitochondria-targeted green fluorescent proteins: convenient tools for the study of organelle biogenesis in *Saccharomyces cerevisiae*. *Yeast* 16: 1421-1427.
8. Lewis MJ, Nichols BJ, Prescianotto-Baschong C, Riezman H, Pelham HR (2000) Specific retrieval of the exocytic SNARE Snc1p from early yeast endosomes. *Mol Biol Cell* 11: 23-38.
9. Reggiori F, Pelham HR (2001) Sorting of proteins into multivesicular bodies: ubiquitin-dependent and -independent targeting. *EMBO J* 20: 5176-5186.

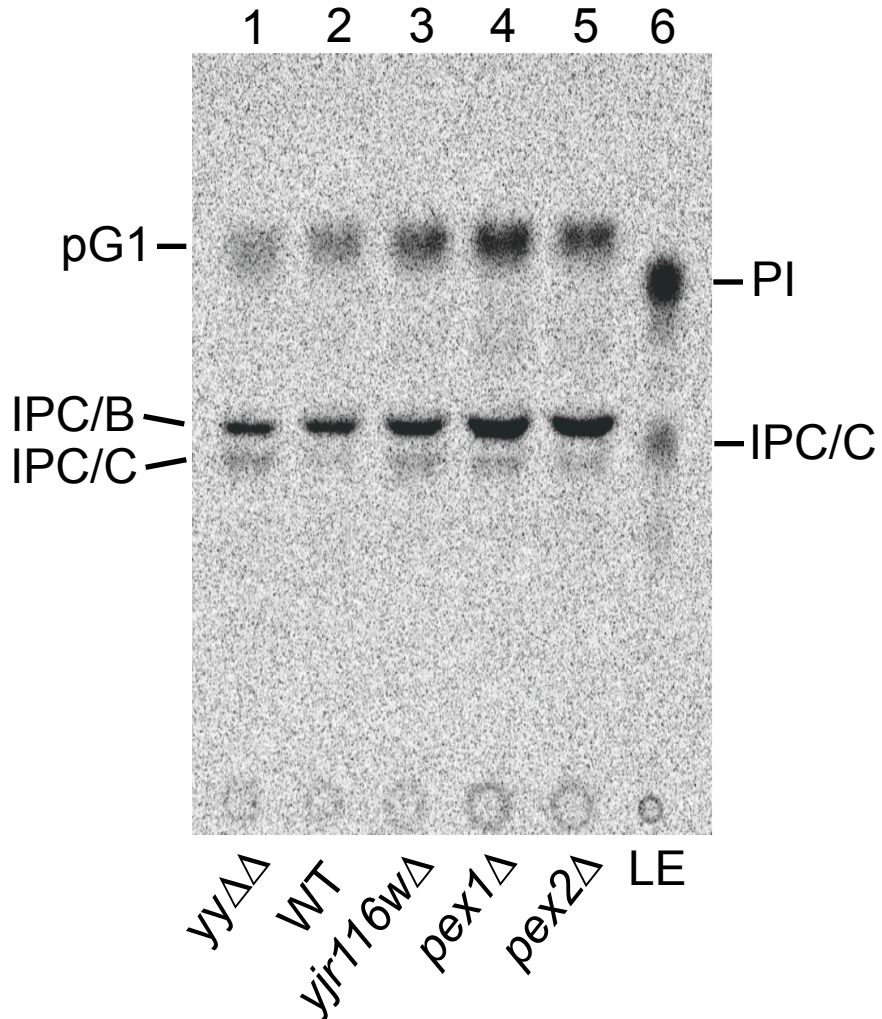

Fig A. GPI remodeling introduces normal amounts of ceramides into GPI anchors of *yjr116wΔ* and *yyΔΔ* cells. 10 OD<sub>600</sub> units of cells were labeled with [<sup>3</sup>H]inositol, GPI anchor lipids were isolated, analyzed by TLC and visualized using the phosphorimager. In addition also two *pex* mutants were tested. pG1 is PI with a C26:0 fatty acid in sn-2 position of glycerol. LE = lipid extract from WT cells containing PIs typically having C18:1 in sn-2.

**A**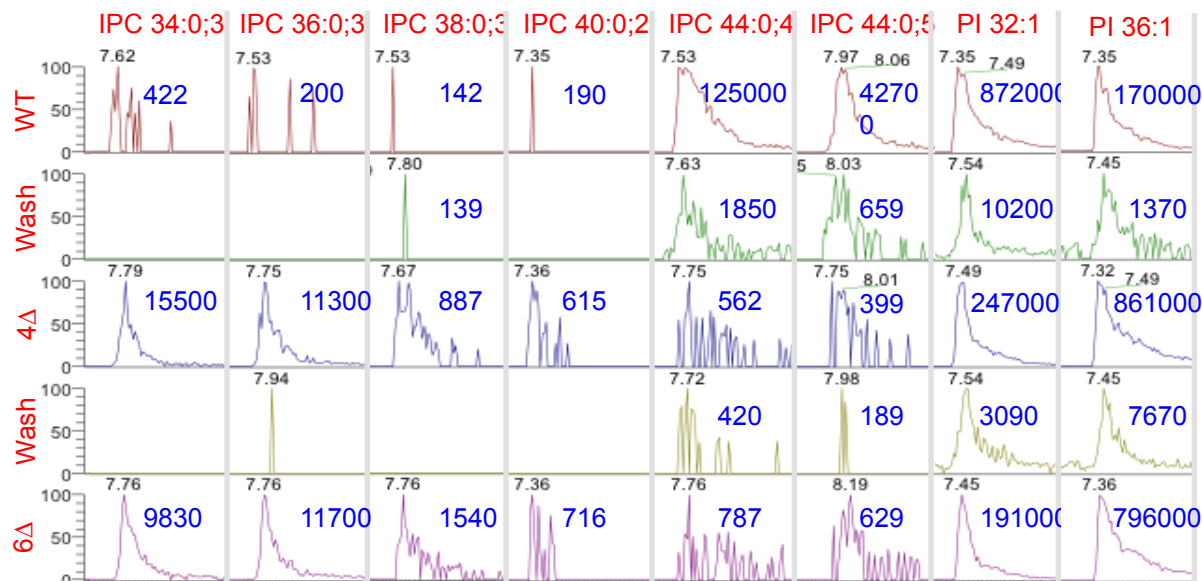**B**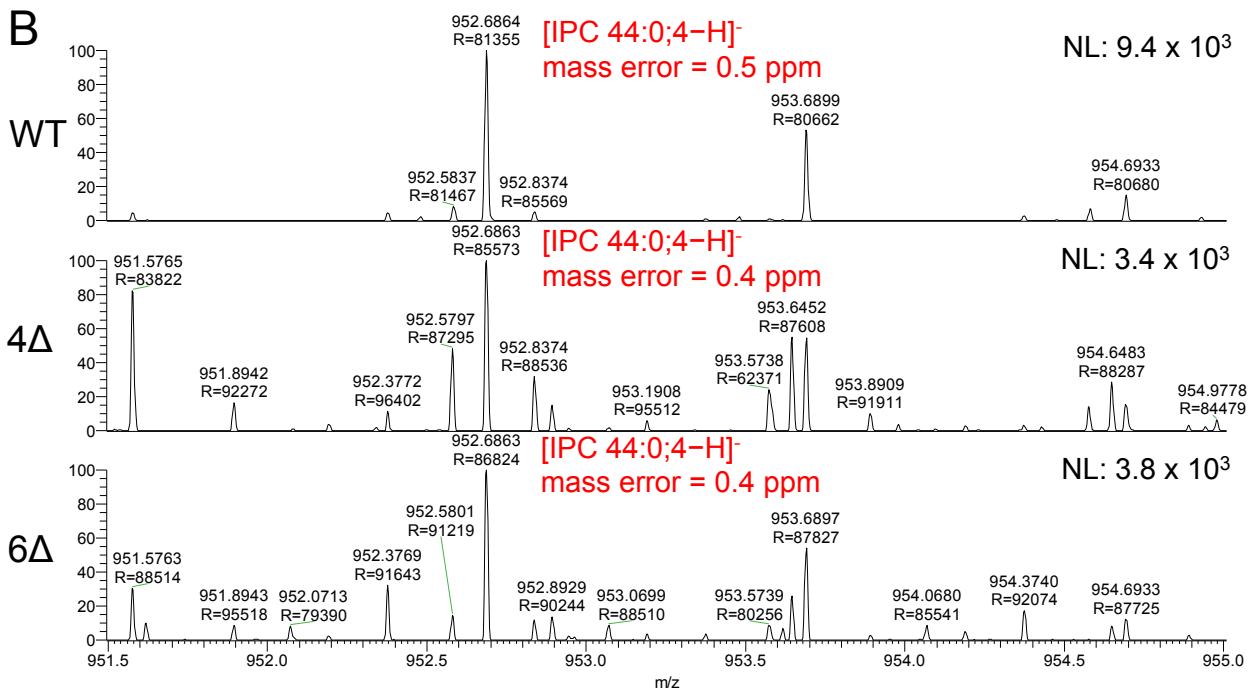**C**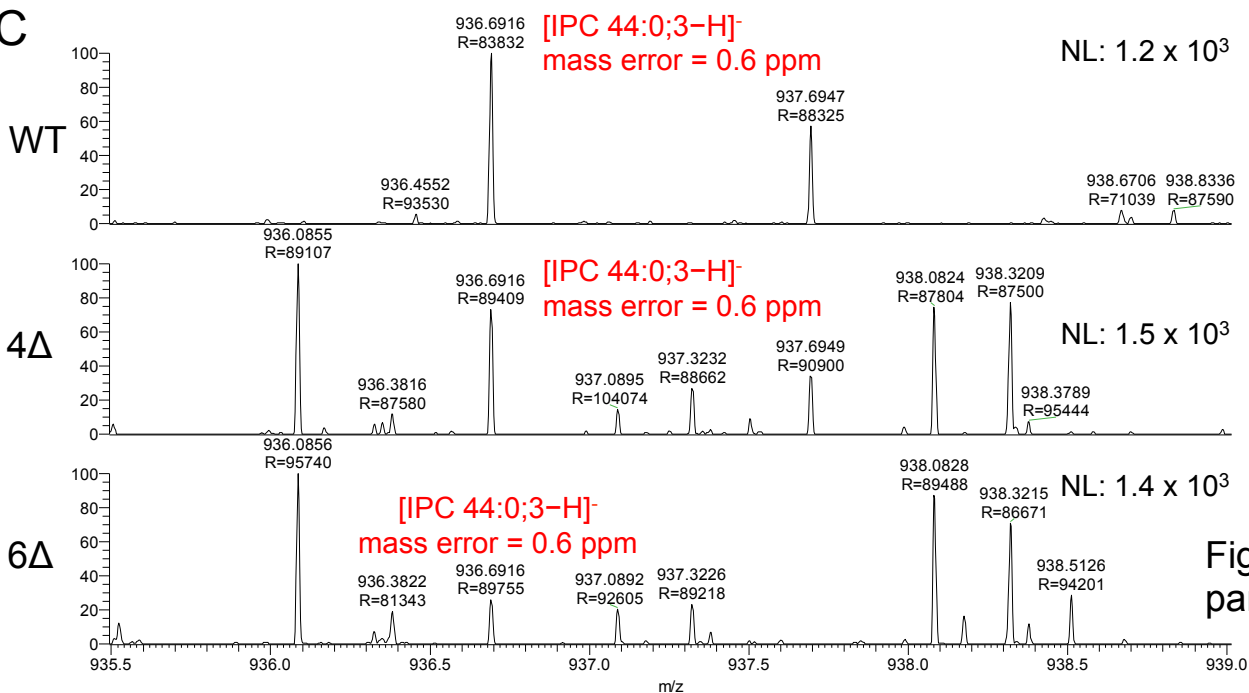Fig B,  
panels A-C

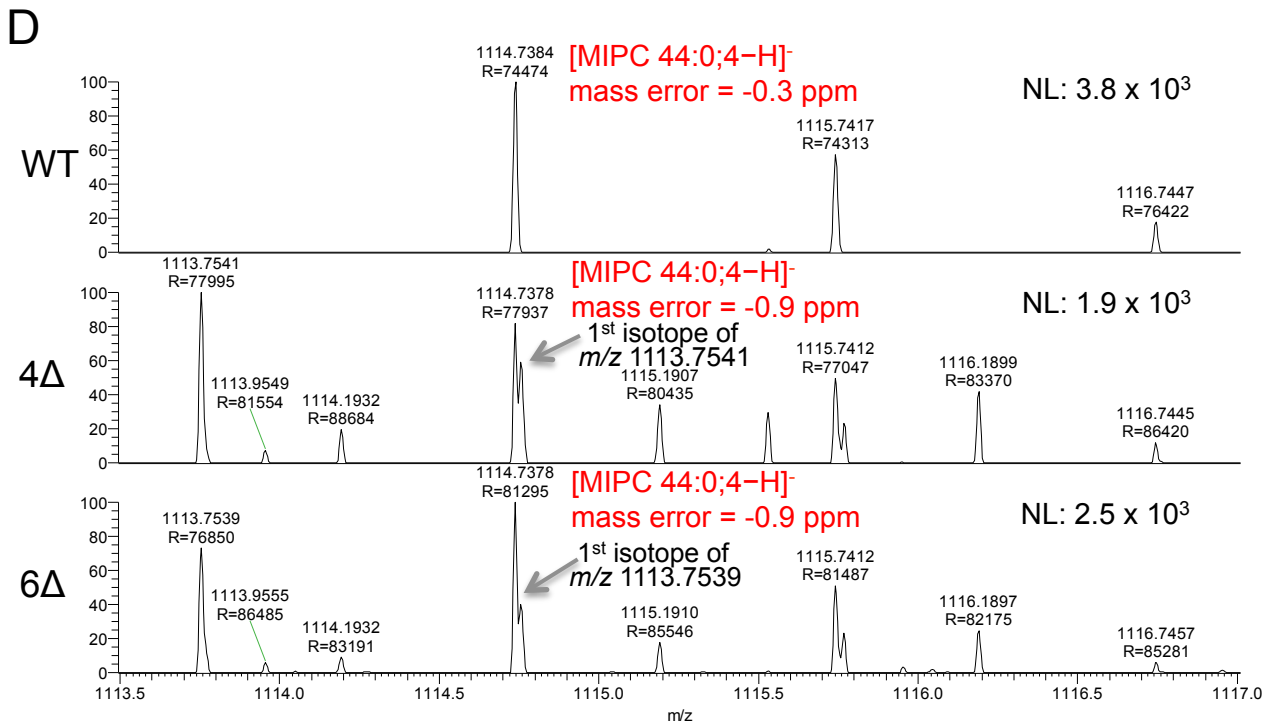

Fig B. A. Extracted ion chromatograms (XIC) of IPCs and PIs in the same NPLC-nanoESI-FTMS experiment as shown in Figs 2A, 2B, and 2E analyzed in the negative ion mode. Elution times of peak signals (in minutes) are in grey, apexes were set to 100 % and the intensity at the apex indicated in blue. B-D. In an independent experiment, lipid extracts from exponentially growing WT (W303), 4Δ and 6Δ cells were deacylated by mild NaOH treatment, desalted and analyzed by direct infusion MS. FTMS profiles for major IPCs and MIPC are shown. Fragmentation of [IPC44:0;4-H]<sup>-</sup> of 4Δ strain yielded the characteristic inositol-phosphate and mannosyl-inositol-phosphate fragments (not shown).

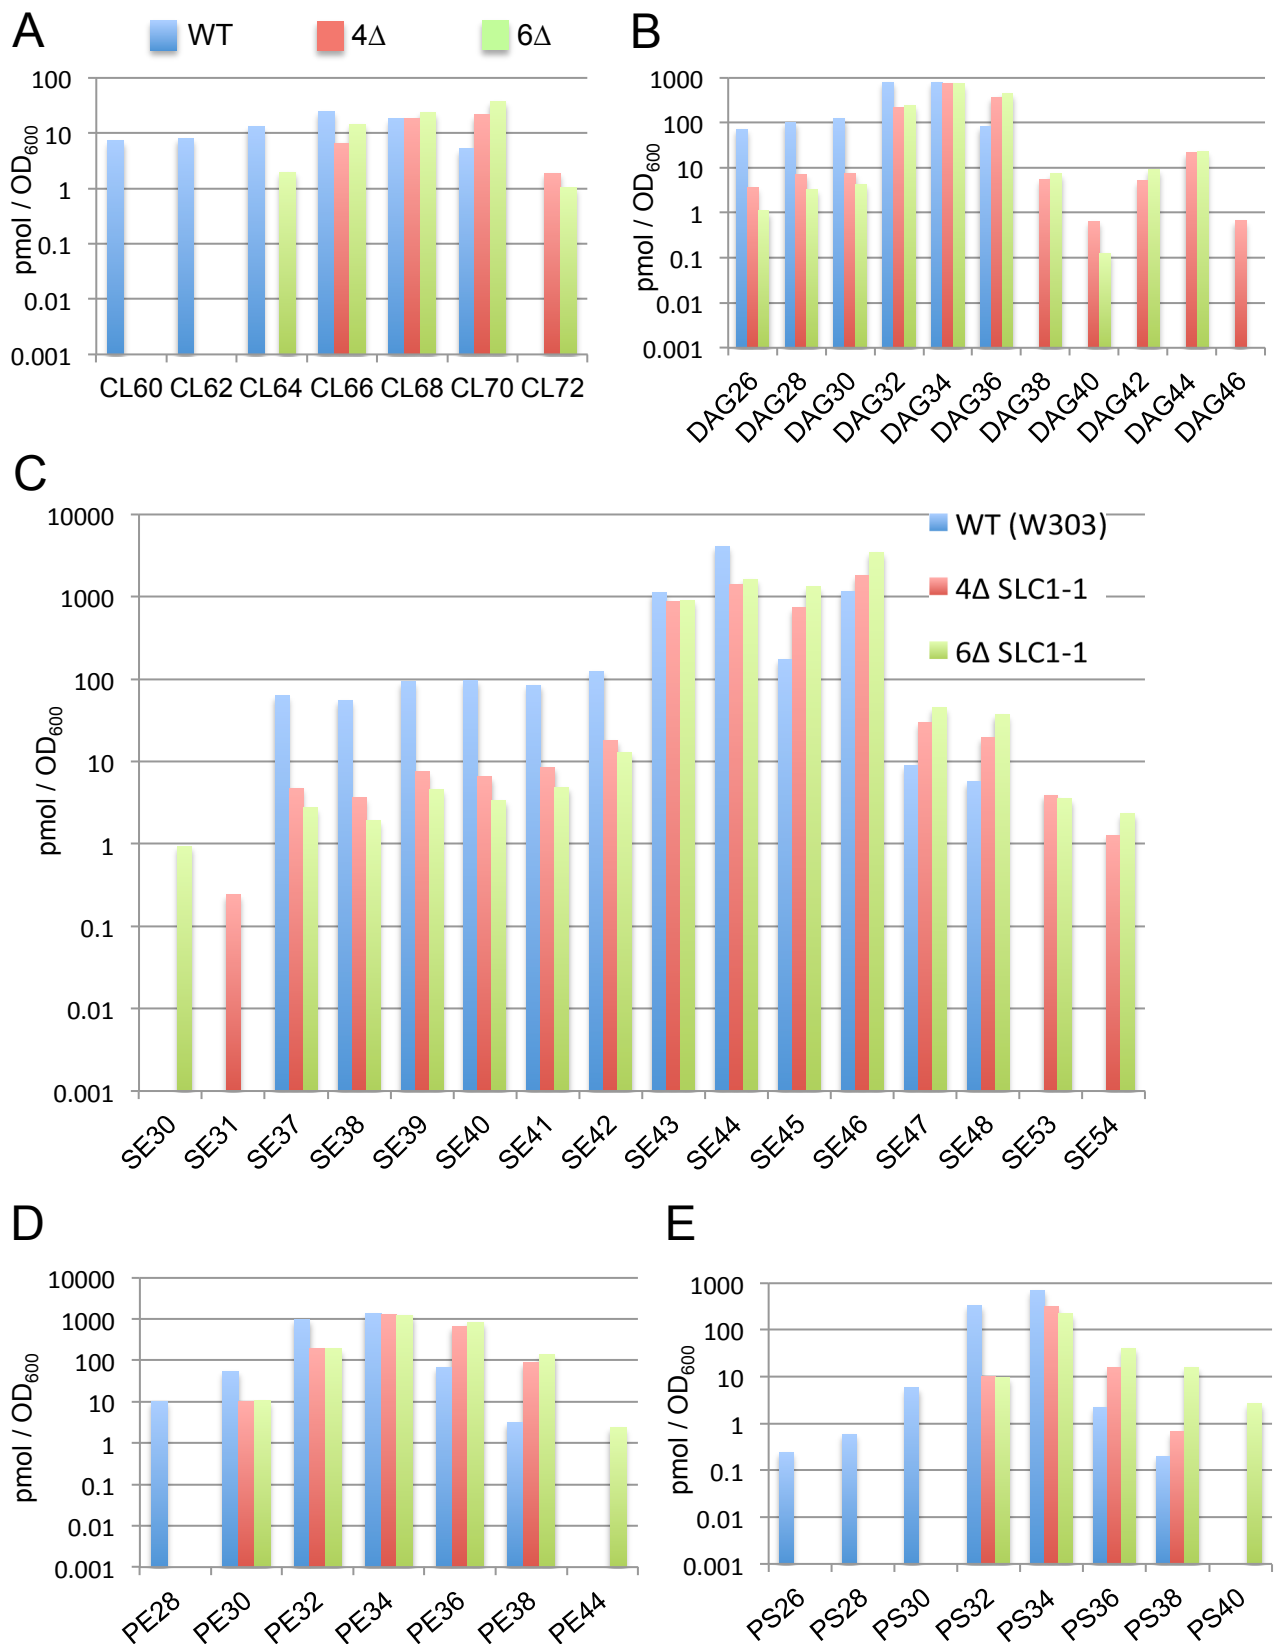

Fig C. Lipid profiles of W303-1A, 4Δ and 6Δ cells were obtained by direct infusion mass spectrometry using the negative ion mode. Quantifications of lipids were done by comparison of intensities with the signals of internal standards belonging to the same lipid class. A. Cardiolipin (CL); B. Diacylglycerol (DAG); C. Steryl ester (SE); D. Phosphatidylethanolamine (PE); E. Phosphatidylserine (PS).

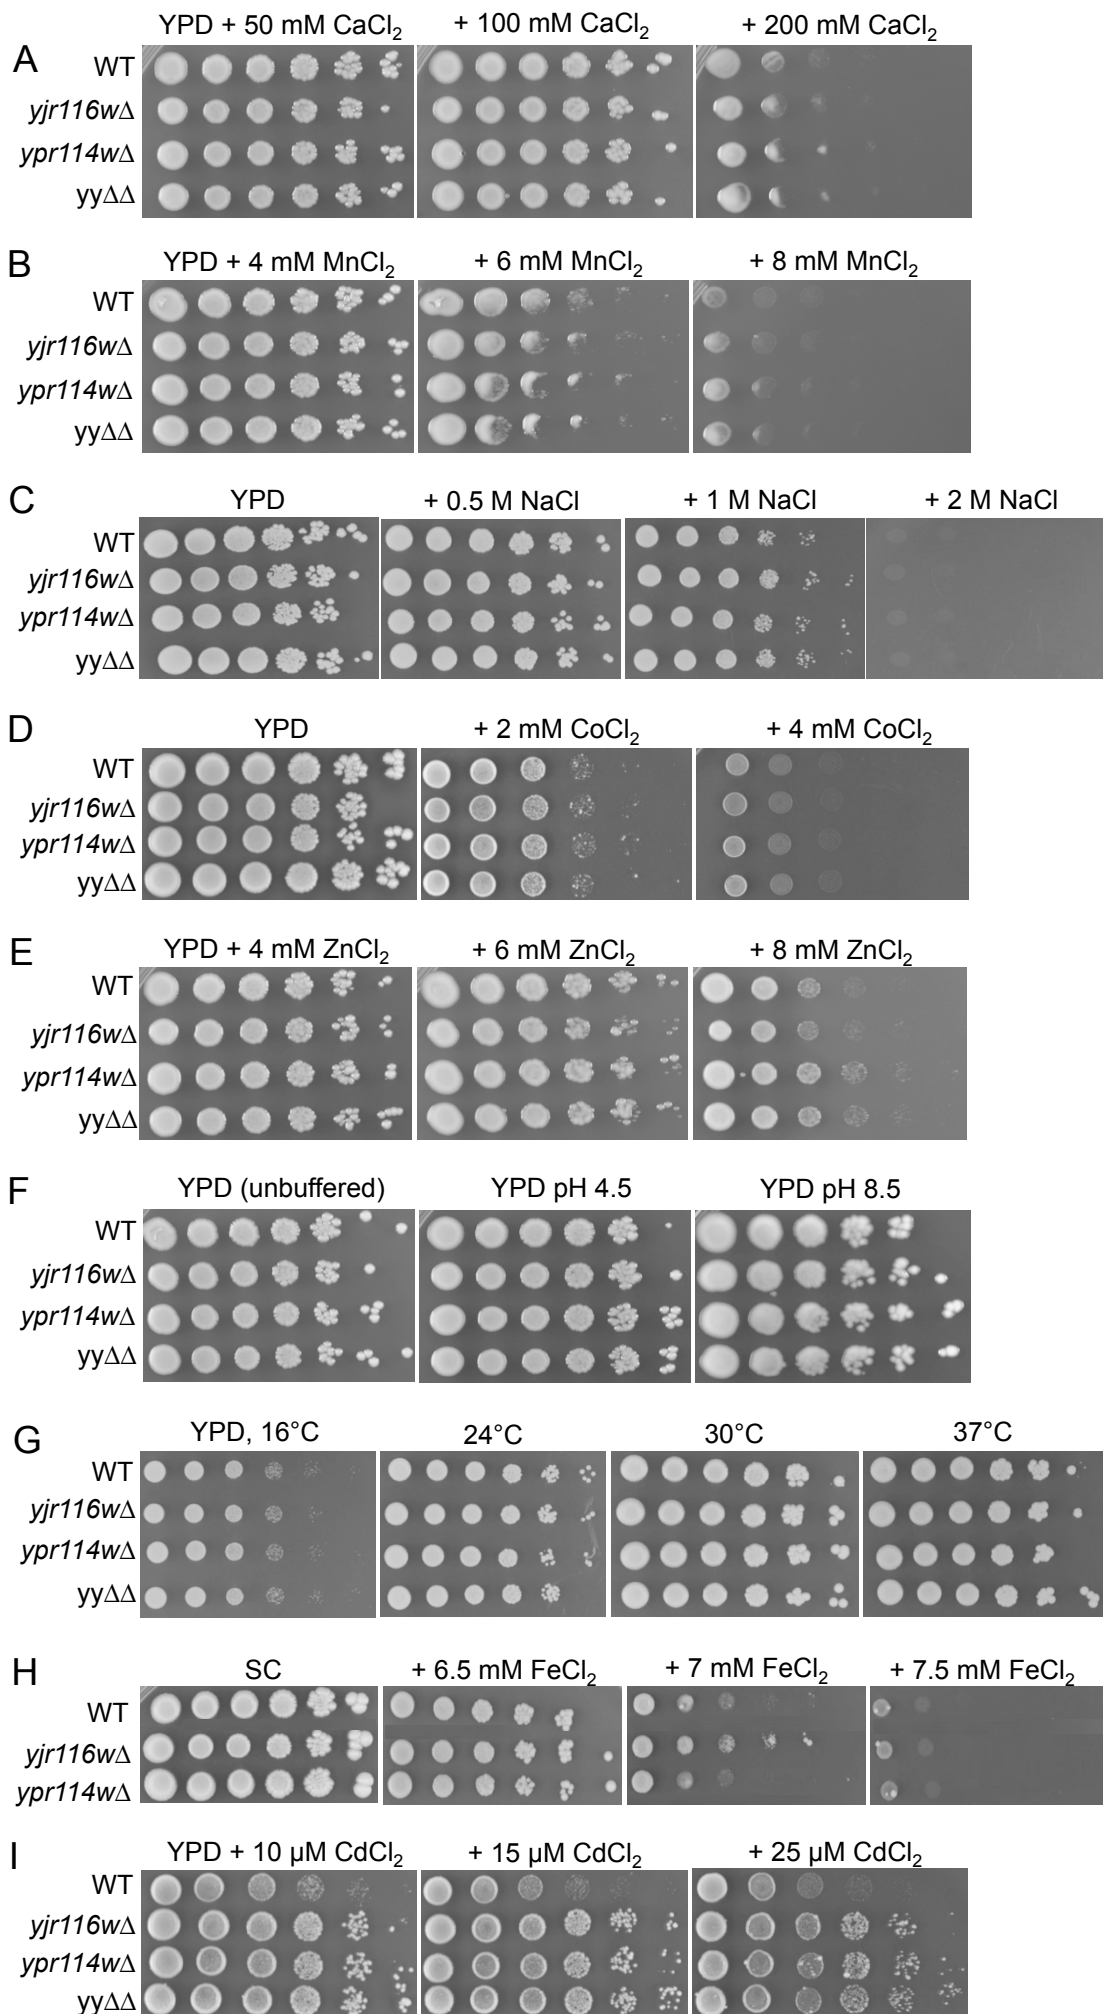

Fig D

Fig D. Growth of WT and mutants on SC media in presence of different metal ions, salt concentrations, H<sup>+</sup> concentrations and temperatures. A. CaCl<sub>2</sub>; B. MnCl<sub>2</sub>; C. NaCl; D. CoCl<sub>2</sub>; E. ZnCl<sub>2</sub>; F. Variable pH; G. Variable temperature; H. FeCl<sub>2</sub>; I. CdCl<sub>2</sub>. (H – S288c background (RH3435, FBY7487, FBY7488), all other panels use strains with BY4742 background).



Fig E. A. *Yjr116w* $\Delta$  cells were crossed with BY4741 WT cells, tetrads were dissected and replicated onto YPD, YPD plus G418 or YPD plus 3 mM Cu<sup>2+</sup>. B - E. Serial dilutions of WT and mutant cells on SC plates containing indicated concentrations of CuSO<sub>4</sub>, NAC and N-acetyl-serine (NAS). Based on the rescue by NAC and the susceptibility to copper, the strains in panel E were categorized in 5 classes as shown in Table D.

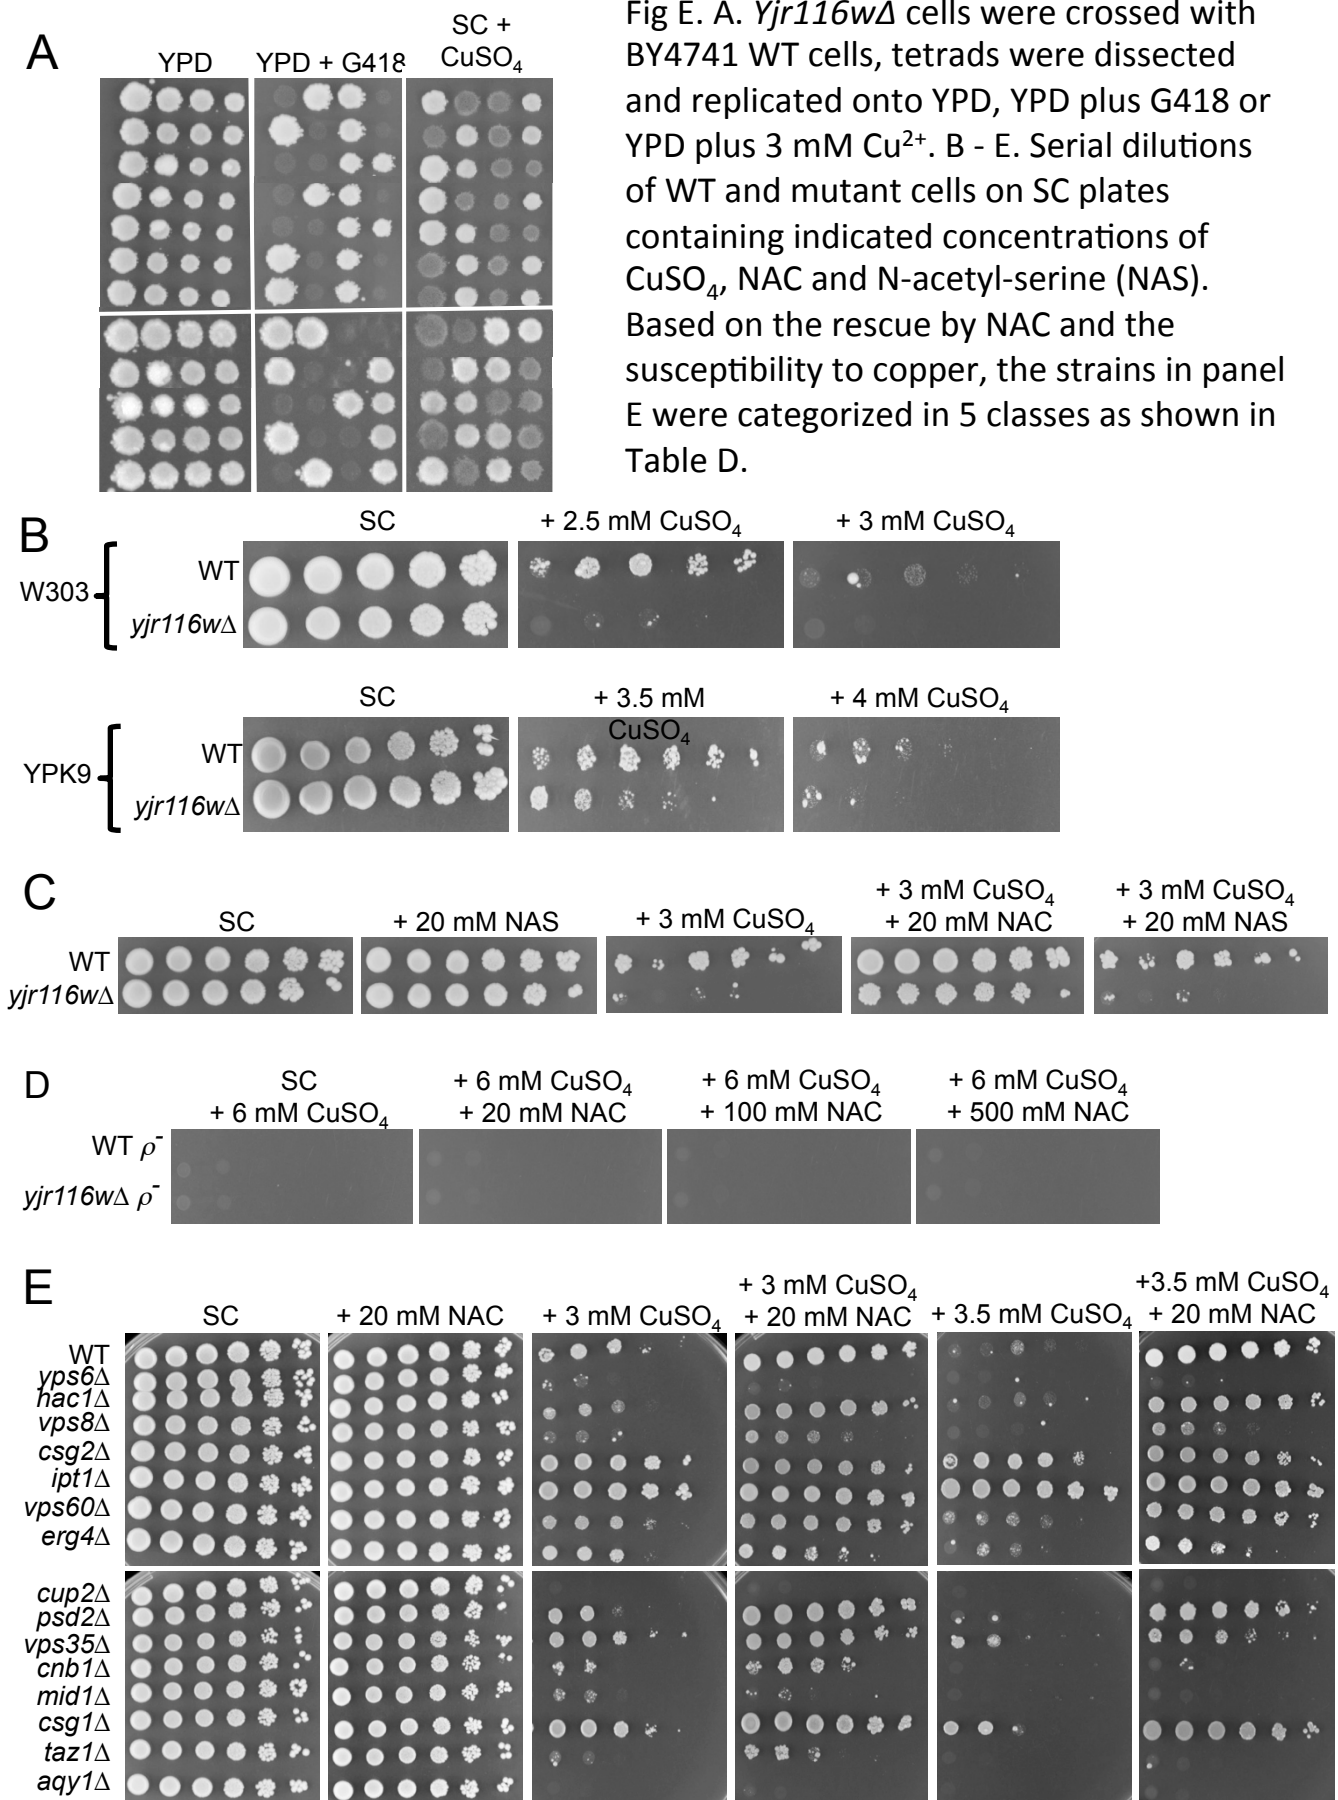

Fig E

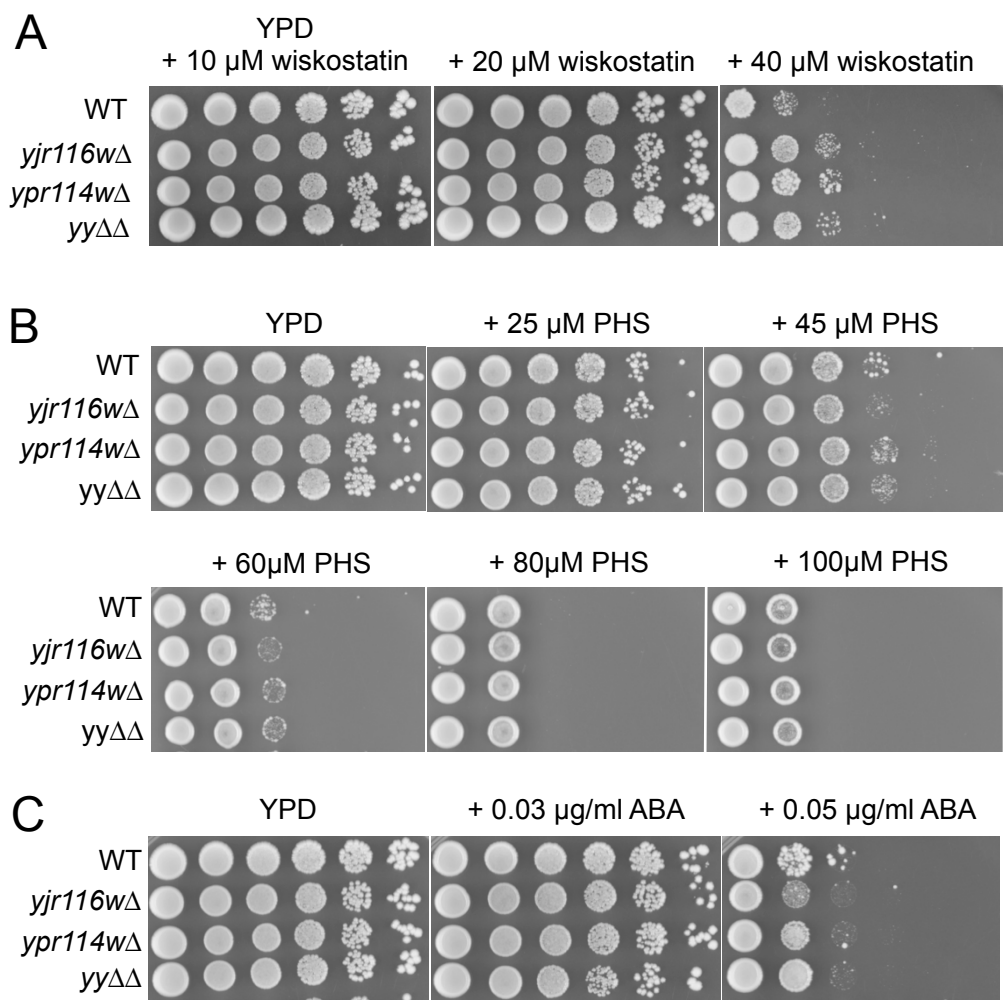

Fig F. Growth of WT and mutants on different concentrations of Wiskostatin (A), PHS (B), and Aureobasidin A (AbA)(C).

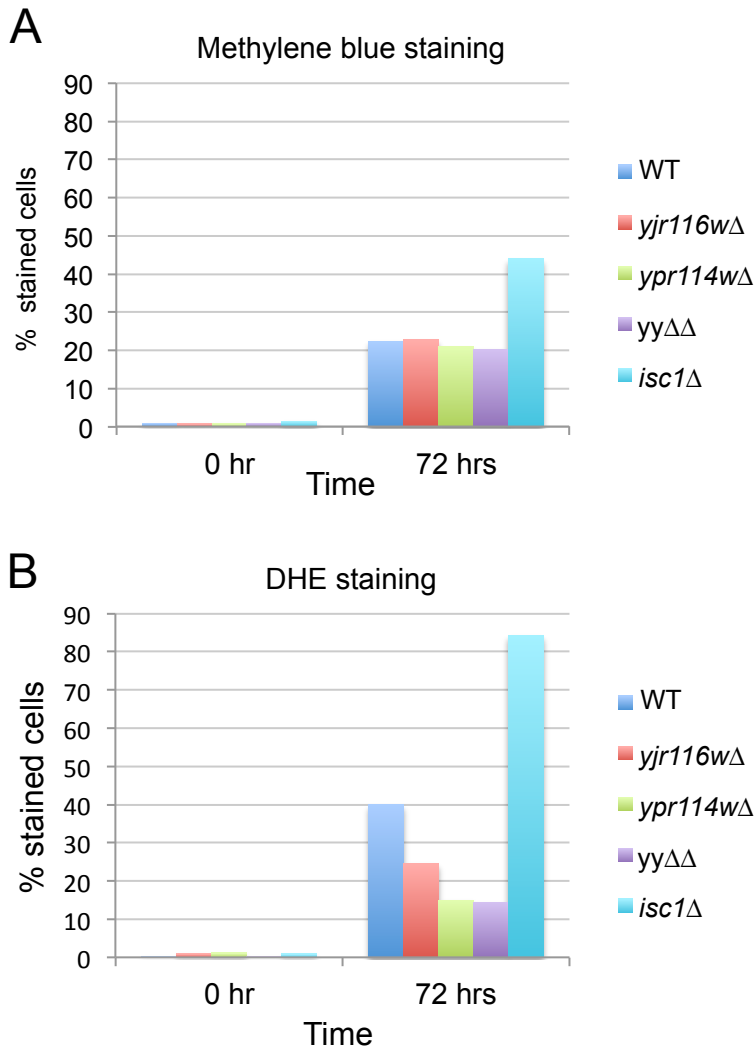

Fig G. Determination of percentages of dead and of superoxide anion accumulating cells before and after 72 h of chronological aging in water. A. Cells grown to exponential phase in YPD were placed for 0 or 72 h into water and were then stained with methylene blue during 2 minutes. Methylene blue stained cells (>200 cells/strain) were counted under microscope within 5 min. B. Same as A but cells were stained with DHE.

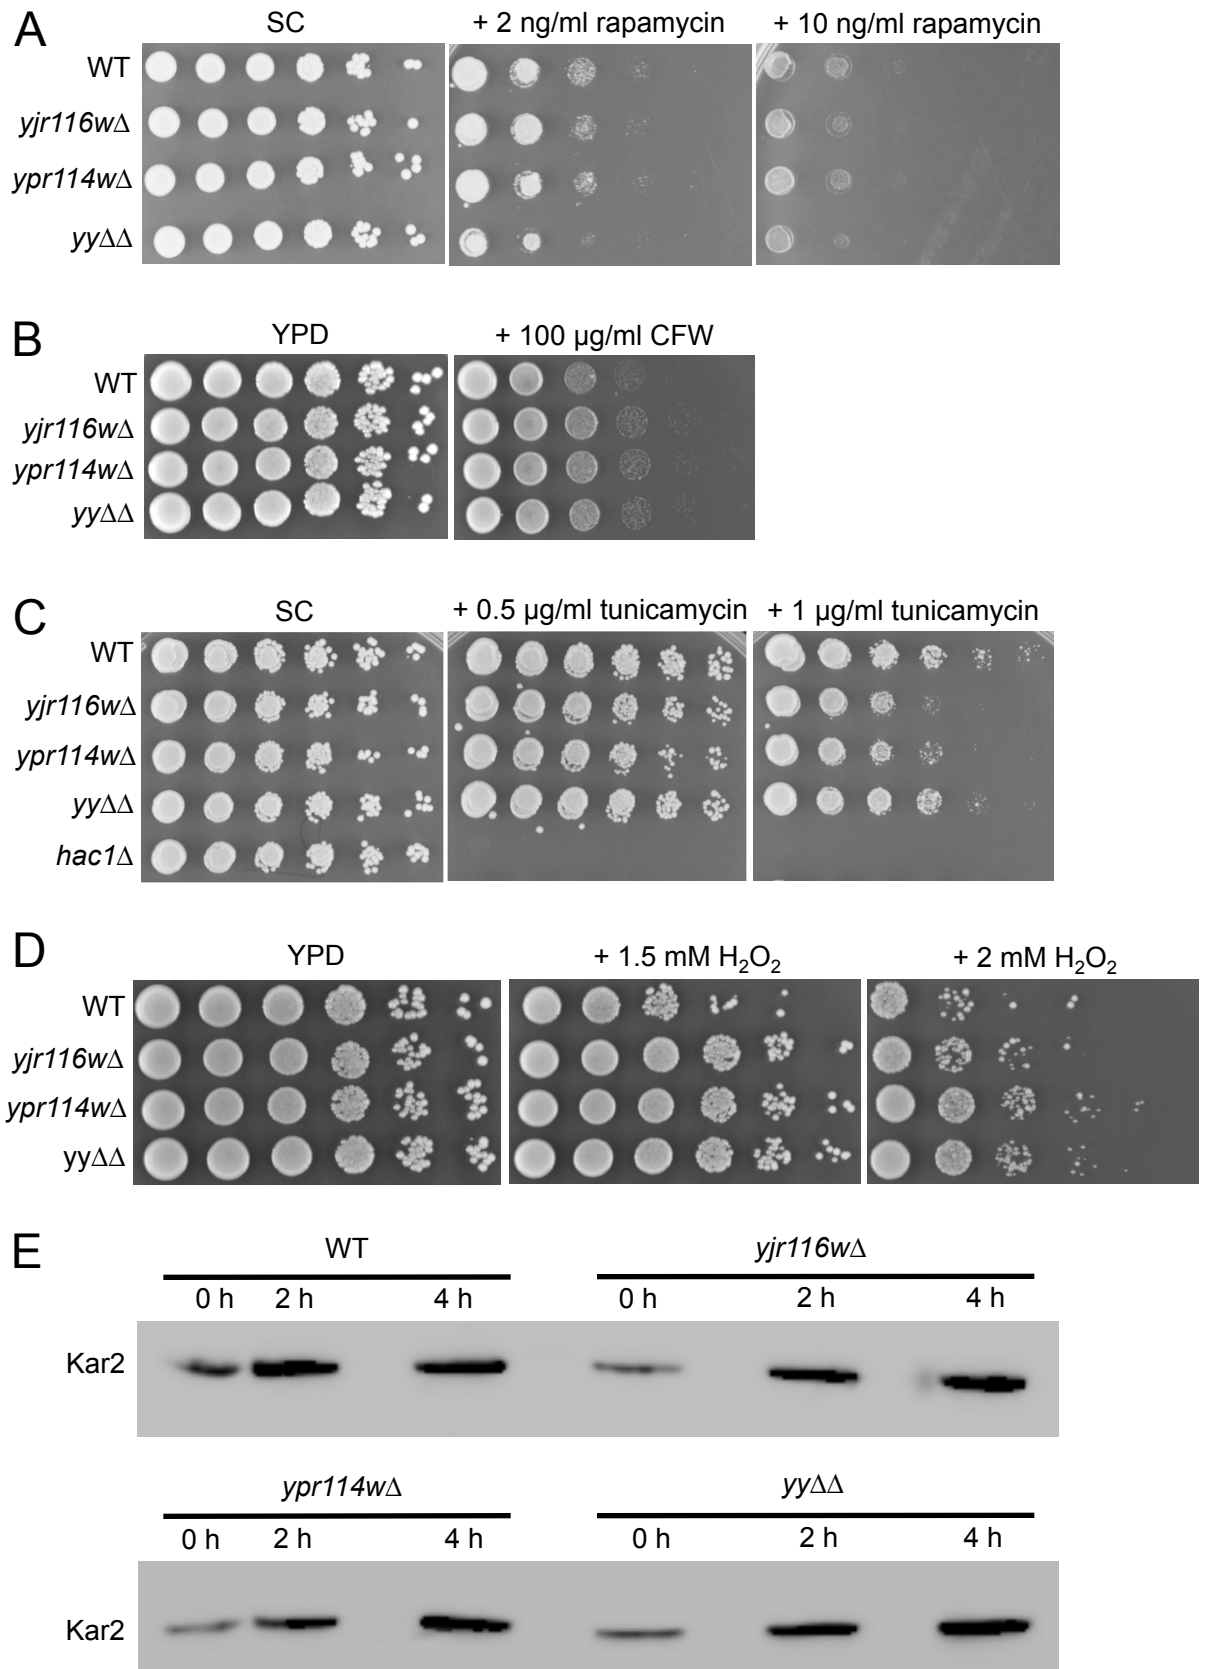

Fig H. Stress resistance of *yjr116wΔ* and *ypr114wΔ* mutants. Serial dilutions of exponentially growing cells were plated on YPD with rapamycin (A), CFW (B), tunicamycin (C) and H<sub>2</sub>O<sub>2</sub> (D). E. Western blot analysis of Kar2 protein after exposing cells for 0 - 4 h to tunicamycin (1 μg ml<sup>-1</sup>).

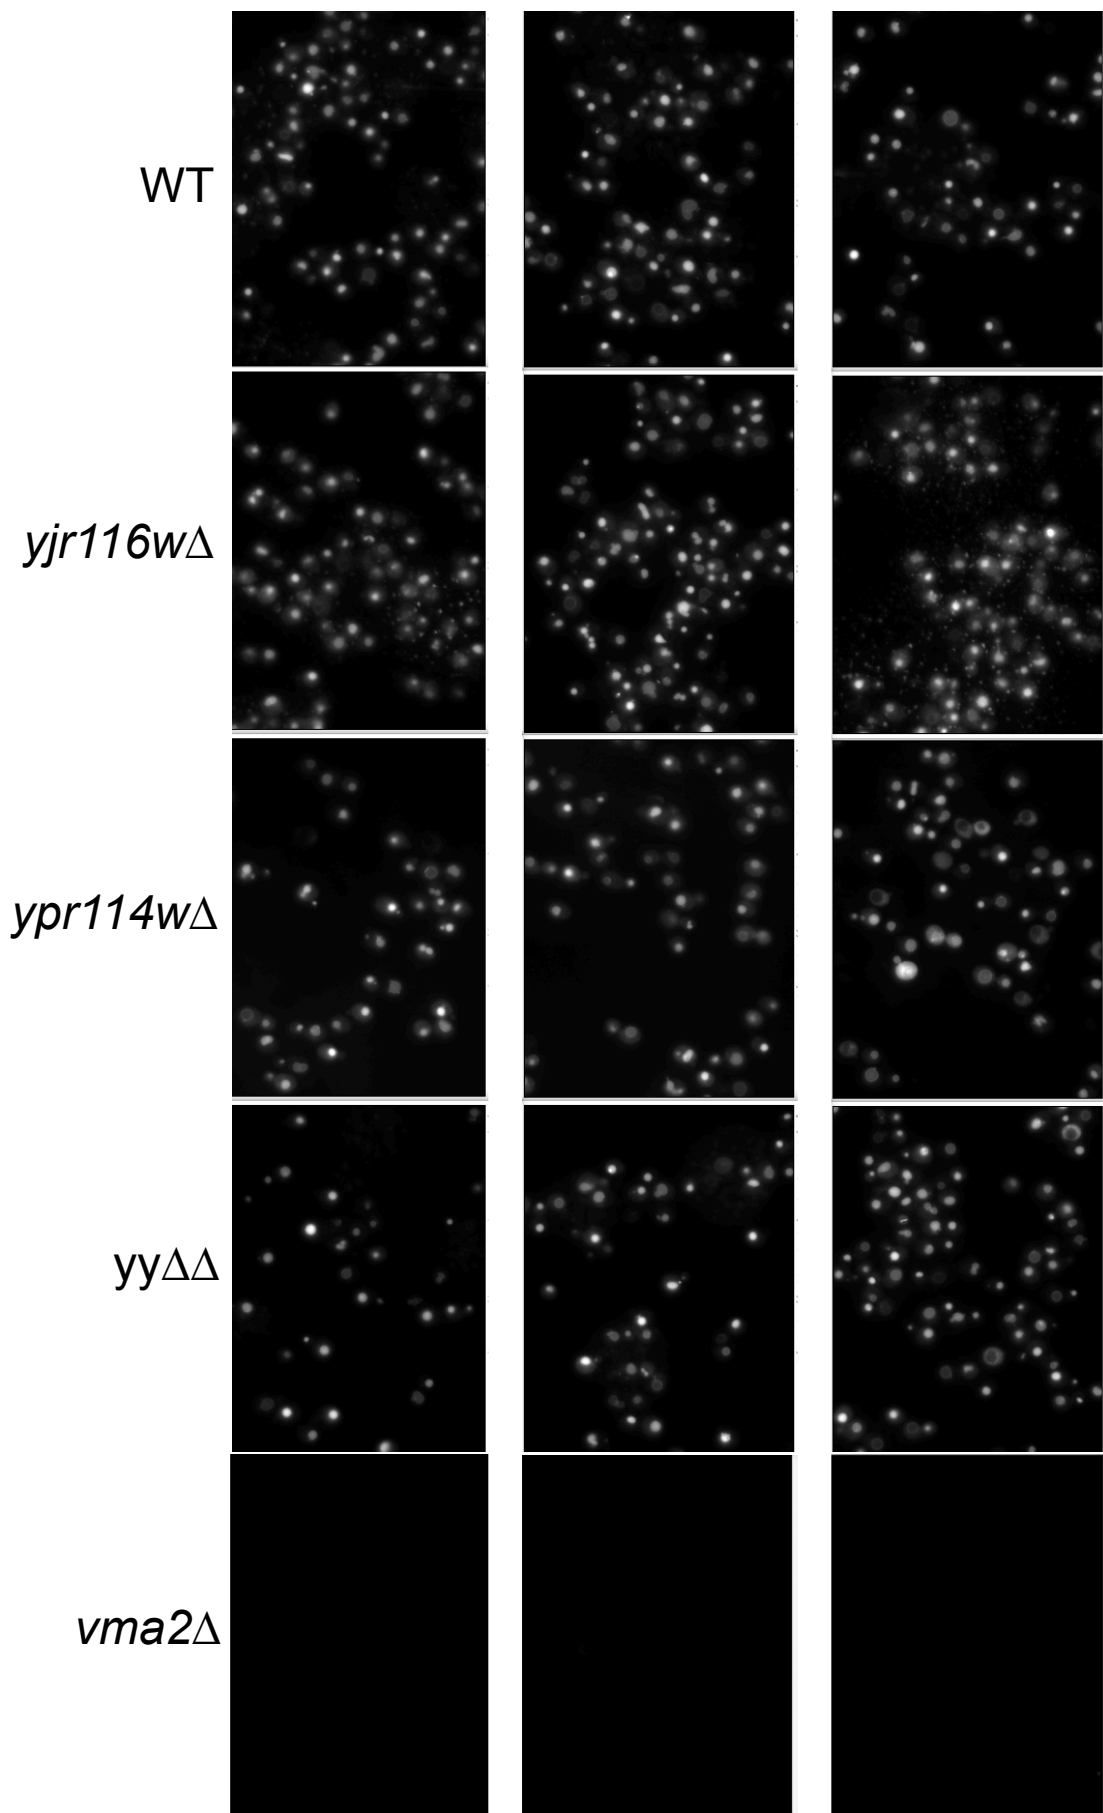

Fig I. WT and mutant cells grown in YPD were stained with quinacrine as described in Experimental Procedures in order to assess their capacity to acidify the vacuole.

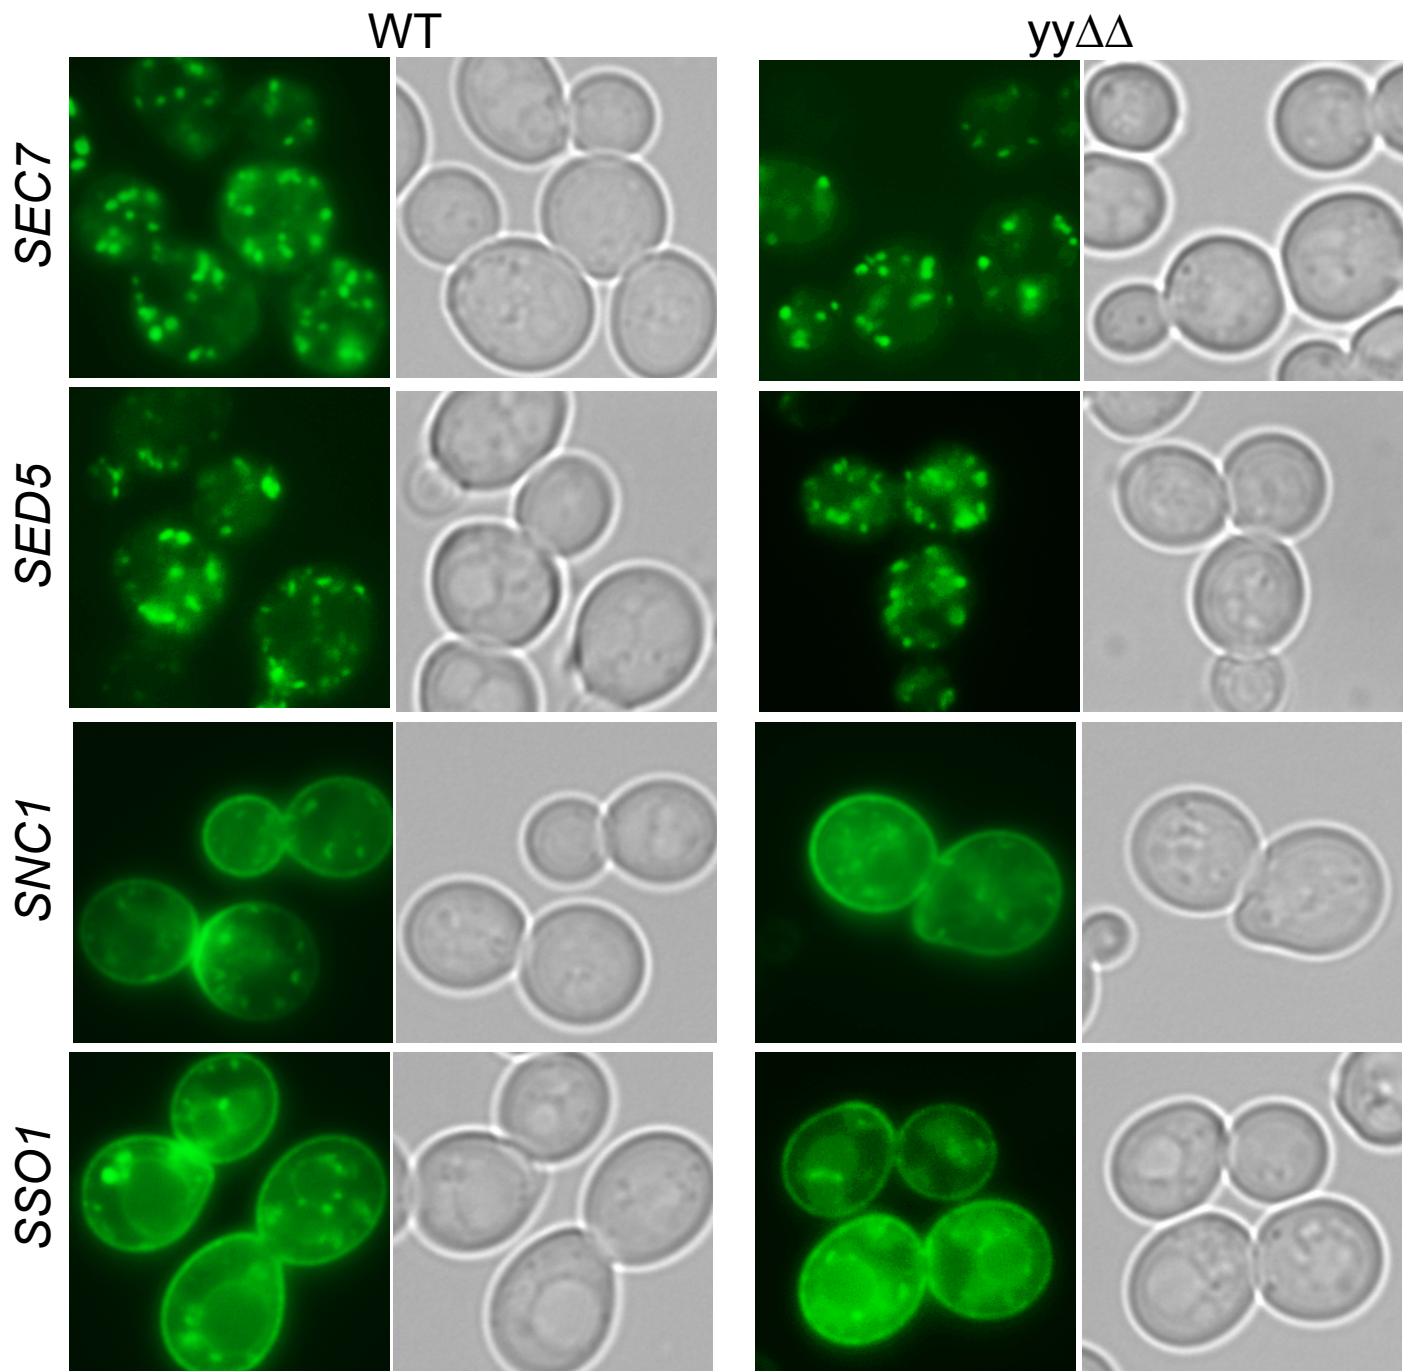

Fig J. Morphology of organelles of the secretory pathway. WT and yy $\Delta\Delta$  cells expressing SEC7-GFP and GFP-SED5, staining the Golgi, GFP-SNC1 and GFP-SSO1, SNARE proteins cycling between Golgi, endosomes and plasma membrane were viewed by fluorescence microscopy. All GFP constructs were expressed from centromeric plasmids under either the *ADH1* or *TPI1* promoter.

WT

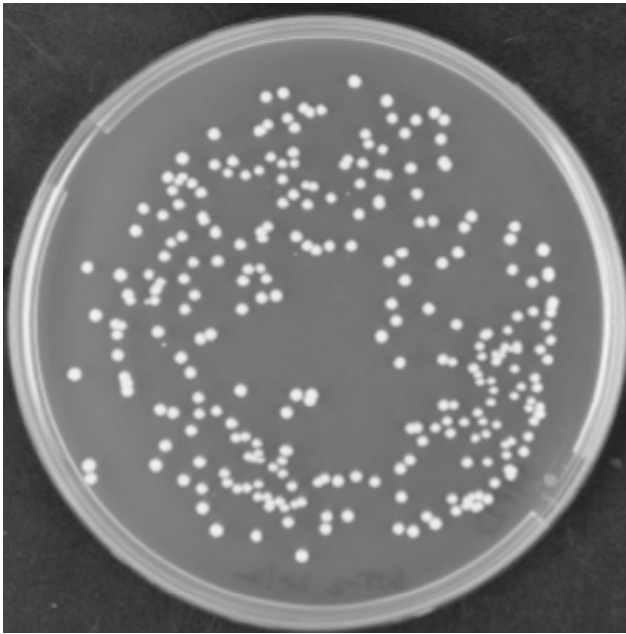

*yjr116w*Δ

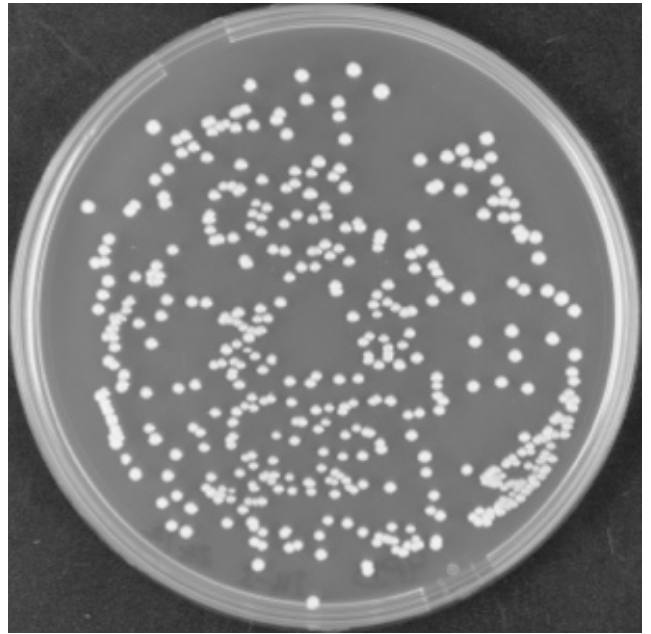

*ypr114w*Δ

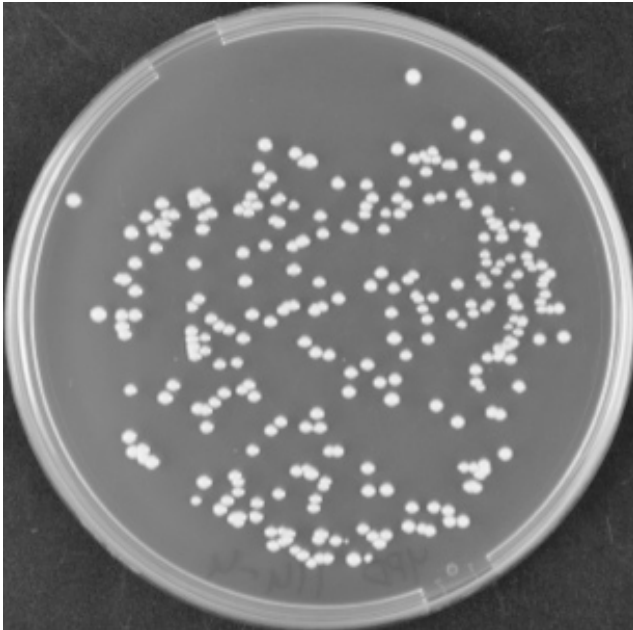

*yy*ΔΔ

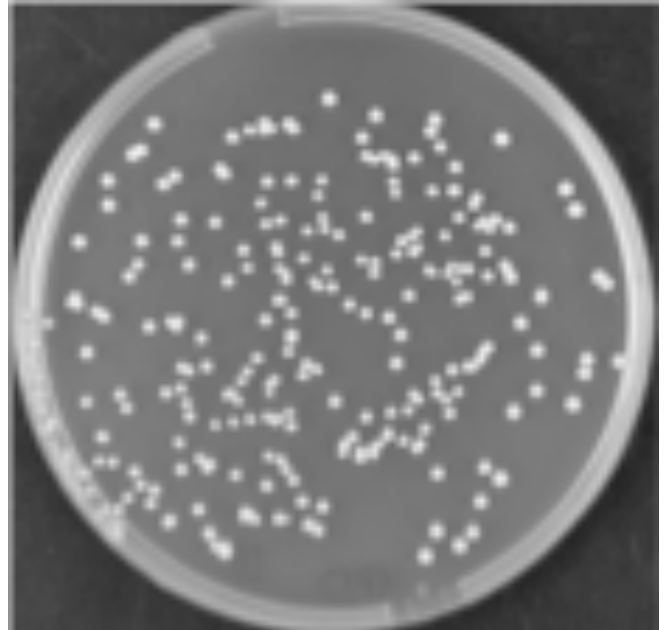

Fig K. Cells were plated on YPD to evaluate whether they had spontaneously been overgrown by petite strains.
